# Supplementary material for: Peptides for Skin Protection and Healing in Amphibians
Source: PubMed Central journal article supplement (PMC6359409; doi:10.3390/molecules24020347), 2019-01-18
Supplement: molecules-24-00347-s001.pdf [file molecules-24-00347-s001.pdf]

## Materials and methods

### Chemicals

Chemicals were supplied by Sigma-Aldrich Corp. (Milan, Italy), unless otherwise indicated.

### Peptide mixture sampling

Peptide secretion was stimulated by injecting 40 nmol norepinephrine per g body weight into the dorsal lymph sacks of *G. excubitor*, *G. nebulanastes*. Frogs were then placed in plastic bags with 24 mL of HPLC water to collect skin secretion. After 15 min, the frogs were removed, 1 mL of 50% HCl was added and samples were partially filtered through Sep Pak C-18 cartridges (Waters Corporation, Milford, MA, USA). Skin peptides were eluted from cartridges with a 70% acetonitrile and 0.1% HCl solution and vacuum centrifuged to dryness. The mixtures were resuspended in PBS and skin peptide concentrations were measured with a Pierce microBCA protein assay kit (Thermo Scientific, Rockford, IL, USA) using bradykinin as standard. Stock solutions at 1 mg/mL were kept at -20°C until used.

### Cell culture and treatments

HECV cells (Cell Bank and Culture-GMP-IST-Genoa, Italy) are a human endothelial cell line isolated from umbilical vein. They were grown at 37 °C in Dulbecco's modified Eagle's medium High Glucose (D-MEM) supplemented with L-Glutamine and 10% FCS. For treatments, cells were grown until 80% confluence, then incubated in serum-free medium with 0.25% bovine serum albumin (BSA). Skin peptide mixture stock solutions (1 mg/mL in PBS) were serially diluted with serum-free culture medium and used for cell treatments at final concentrations of 0.005, 0.05, 0.5, 5 and 50 µg/mL.

### Cell viability

The viability of HECV cells upon exposure to peptide mixtures was determined by the MTT [3-(4,5-dimethylthiazol-2-yl)-2,5-diphenyltetrazolium bromide] assay on 96-well plates. The cells were plated at a density of 15'000 cells/well and allowed to adhere overnight. Then the skin peptide mixtures were added in serum-free medium at concentrations ranging from 0.005 to 50 µg/mL for 24 h. The MTT substrate was prepared in PBS/EDTA, added to cells in culture at a final concentration of 0.5mg/ml and incubated for 3 h. Viable cells with active metabolism converted MTT into a purple colored formazan product whose absorbance was measured at 570 nm using a plate reading spectrophotometer. The results of these experiments are shown in figure S1.

### Wound healing assay

80'000 cells/well were seeded onto 12-well plates and grew for 24 h or until confluence was reached. Then the cell monolayer was scraped with a p100 yellow pipet tip to create a "scratch" (Eppendorf AG, Hamburg, Germany).

After washing, scratch images were recorded under the microscope at time 0 (T0). Then the medium was replaced with fresh serum-free medium containing different concentrations of skin peptide mixtures. After 24 h, scratch images were acquired again (T24). All images were analysed using ImageJ free software (<http://imagej.nih.gov/ij/>) and the distances between wound edges were measured. A decrease in edge distance after 24 hours as compared to T0 indicated the migration of cells to close the wound [74].

### Statistical analysis

Data are expressed as mean  $\pm$  SD of at least three independent experiments performed in triplicate. Statistical analysis was performed using ANOVA with Tukey's post-test (GraphPad Software, Inc., San Diego, CA, USA).

### Secondary Structure Prediction

The percentages of the main secondary structures occurring in all amphibian peptides were predicted by theoretical calculations using the GOR IV algorithm [75]. This algorithm is the fourth version of a secondary structure prediction method based on the information theory. GOR IV allowed us to establish the structural code relating the amino acid sequence and the secondary structure of a protein. This database uses as data source a pool of 267 protein structures having a resolution better than 2.5 Å and with a length greater than 50 residues.

74. Vergani, L.; Vecchione, G.; Baldini, F.; Grasselli, E.; Voci, A.; Portincasa, P.; Ferrari, P. F.; Aliakbarian, B.; Casazza, A. A.; Perego, P. Polyphenolic extract attenuates fatty acid-induced steatosis and oxidative stress in hepatic and endothelial cells. *Eur. J. Nutr.* **2018**, *57*, 1793-1805.
75. Garnier, J.; Gibrat, J. F.; Robson, B., GOR method for predicting protein secondary structure from amino acid sequence. *Methods Enzymol.* **1996**, *266*, 540-53.

A) *Gastrotheca excubitor* (GE)

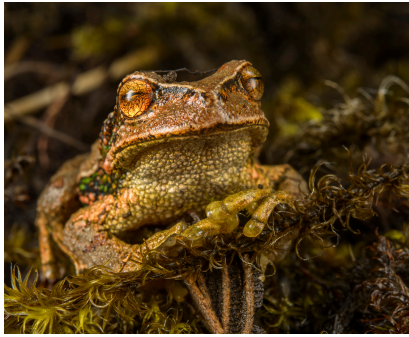

B) *Gastrotheca nebulanastes* (GN)

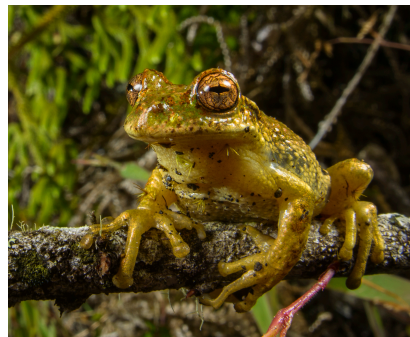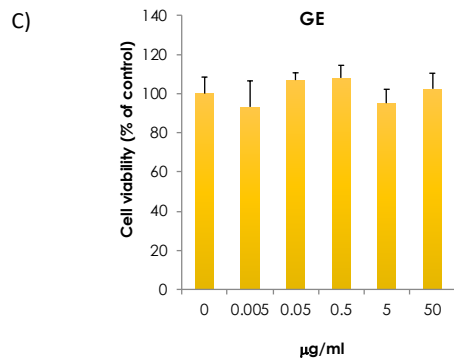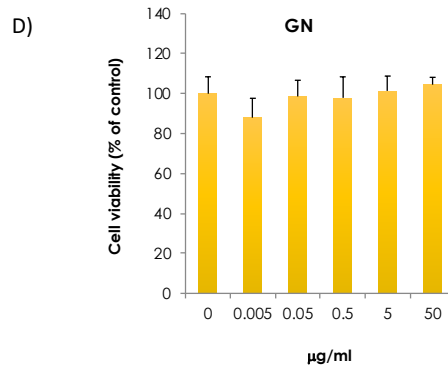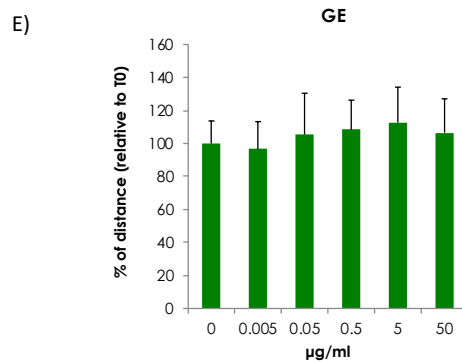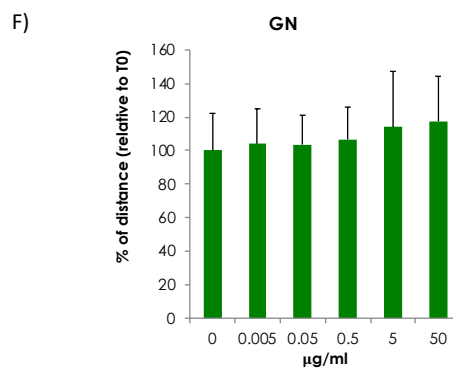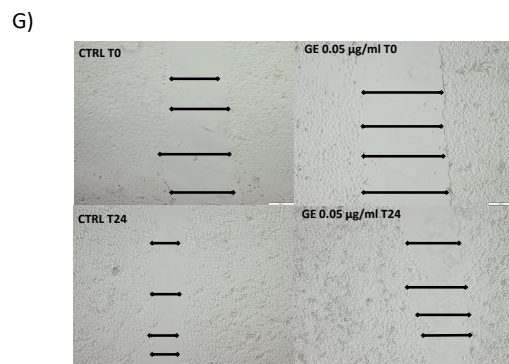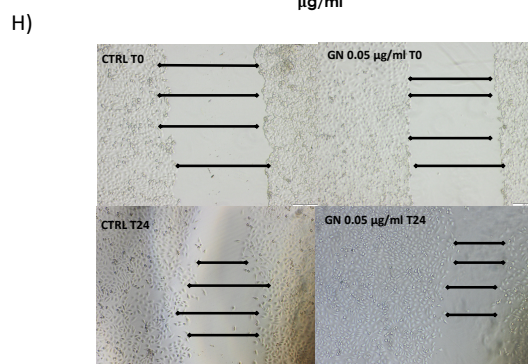

**Figure S1. Effects of skin peptide mixtures on wound healing.** Effects of skin peptide mixtures from *G. excubitor* (GE, A) and *G. nebulanastes* (GN, B) on cell viability (C and D respectively) and WH process (E and F respectively) in the human endothelial vascular cell line HECV.: percentage of wound edge distance after 24 h of treatment (T24) as compared to T0. G, H: representative images of the effects of skin peptides at 0.05 µg/ml vs controls (CTRL).
